# Supplementary material for: Artemisia arborescens and Artemisia inculta from Crete; Secondary Metabolites, Trace Metals and In Vitro Antioxidant Activities
Source: MDPI journal article supplement (doi:10.3390/life13061416), 2023-06-19
Supplement: s1 [file s1]

## Supplementary material related to the article

### *Artemisia arborescens* and *Artemisia inculta* from Crete; secondary metabolites, trace metals and *in vitro* antioxidant activities

**Table S1.** Target and qualifier ions for the trimethylsilyl ethers (TMS) of simple phenols, stilbenes, terpenic compounds, and the internal standard(IS).

| Compound                            | Rt (min) | Molecular Formula                              | Type             | Target ion | Qualifier ions |
|-------------------------------------|----------|------------------------------------------------|------------------|------------|----------------|
| <u>Phenolic compounds</u>           |          |                                                |                  |            |                |
| 3-(4-hydroxyphenyl)-1-propanol (IS) | 22.20    | C <sub>9</sub> H <sub>12</sub> O <sub>2</sub>  | I.S. (Phenol)    | 206        | 191, 179       |
| Caffeic acid                        | 39.48    | C <sub>9</sub> H <sub>8</sub> O <sub>4</sub>   | Phenol           | 396        | 219, 381       |
| Chlorogenic acid                    | 48.78    | C <sub>16</sub> H <sub>18</sub> O <sub>9</sub> | Phenol           | 345        | 307, 324       |
| Chrysin                             | 45.44    | C <sub>15</sub> H <sub>10</sub> O <sub>4</sub> | Phenol           | 383        | 355, 474       |
| <i>p</i> -Coumaric acid             | 35.38    | C <sub>9</sub> H <sub>8</sub> O <sub>3</sub>   | Phenol           | 308        | 293, 219       |
| Ferulic acid                        | 38.77    | C <sub>10</sub> H <sub>10</sub> O <sub>4</sub> | Phenol           | 338        | 323, 308       |
| Gallic acid                         | 36.64    | C <sub>7</sub> H <sub>6</sub> O <sub>5</sub>   | Phenol           | 281        | 458, 443       |
| <i>p</i> -Hydroxybenzoic acid       | 19.80    | C <sub>7</sub> H <sub>6</sub> O <sub>3</sub>   | Phenol           | 267        | 223, 193       |
| <i>p</i> -Hydroxyphenylacetic acid  | 20.50    | C <sub>8</sub> H <sub>8</sub> O <sub>3</sub>   | Phenol           | 252        | 296, 281       |
| Kaempferol                          | 48.15    | C <sub>15</sub> H <sub>10</sub> O <sub>6</sub> | Phenol           | 559        | 560            |
| Naringenin                          | 46.28    | C <sub>15</sub> H <sub>12</sub> O <sub>5</sub> | Phenol           | 473        | 296            |
| Phloretic acid                      | 26.11    | C <sub>9</sub> H <sub>10</sub> O <sub>3</sub>  | Phenol           | 192        | 310            |
| Protocatechuic acid                 | 30.70    | C <sub>7</sub> H <sub>6</sub> O <sub>4</sub>   | Phenol           | 193        | 355, 370       |
| Quercetin                           | 49.44    | C <sub>15</sub> H <sub>10</sub> O <sub>7</sub> | Phenol           | 647        | 575            |
| Resveratrol                         | 45.03    | C <sub>14</sub> H <sub>12</sub> O <sub>3</sub> | Stilbene         | 444        | 445, 443       |
| Sinapic acid                        | 40.54    | C <sub>11</sub> H <sub>12</sub> O <sub>5</sub> | Phenol           | 368        | 353, 338       |
| Syringic acid                       | 34.77    | C <sub>9</sub> H <sub>10</sub> O <sub>5</sub>  | Phenol           | 327        | 342, 312       |
| Tyrosol                             | 18.31    | C <sub>8</sub> H <sub>10</sub> O <sub>2</sub>  | Phenol           | 179        | 267, 282       |
| Vanillic acid                       | 26.53    | C <sub>8</sub> H <sub>8</sub> O <sub>4</sub>   | Phenol           | 297        | 267, 312       |
| <u>Terpenic compounds</u>           |          |                                                |                  |            |                |
| Erythrodiol                         | 55.47    | C <sub>30</sub> H <sub>50</sub> O <sub>2</sub> | Terpenic alcohol | 216        | 203, 189       |
| Uvaol                               | 56.22    | C <sub>30</sub> H <sub>50</sub> O <sub>2</sub> | Terpenic alcohol | 203        | 216, 188       |
| Oleanolic acid                      | 55.86    | C <sub>30</sub> H <sub>48</sub> O <sub>3</sub> | Terpenic acid    | 203        | 202, 482       |
| Ursolic acid                        | 56.94    | C <sub>30</sub> H <sub>48</sub> O <sub>3</sub> | Terpenic acid    | 203        | 202, 482       |

A selective ion monitoring (SIM) GC–MS method was applied for the detection and identification of the trimethylsilyl ethers (TMS) of seventeen phenolic compounds, one stilbene, two terpenic alcohols and two terpenic acids based on the  $\pm 0.05$  RT presence of target and qualifier ions of pure commercial standards at the predetermined ratios. Quantification was achieved by constructing reference curves for each compound and employing 3-(4-hydroxyphenyl)-1-propanol as internal standard.
